# Supplementary material for: Acrylamide Decreases Cell Viability, and Provides Oxidative Stress, DNA Damage, and Apoptosis in Human Colon Adenocarcinoma Cell Line Caco-2
Source: MDPI journal article supplement (doi:10.3390/molecules25020368), 2020-01-16
Supplement: s1 [file s1]

## Supporting Information

**Table S1.** Viability of Caco-2 cells in the presence of acrylamide determined by the MTT assay in Caco-2 cells after 24 h, 48 h and 72 h exposure. Each value represents the mean of eight repeats. Results are presented as mean  $\pm$  standard deviation (SD). \* Results significantly different from unexposed control, ANOVA ( $p < 0.05$ ).

| Acrylamide<br>concentration [mM] | Viability of Caco-2 cells [%] $\pm$ SD |                 |                 |
|----------------------------------|----------------------------------------|-----------------|-----------------|
|                                  | 24 h                                   | 48 h            | 72 h            |
| 0.2                              | 114.0 $\pm$ 0.7                        | 122.6 $\pm$ 1.6 | 105.4 $\pm$ 1.2 |
| 0.4                              | 123.8 $\pm$ 0.4                        | 113.8 $\pm$ 1.9 | 90.9 $\pm$ 1.1  |
| 0.8                              | 114.8 $\pm$ 0.5                        | 98.1 $\pm$ 1.6  | 45.1 $\pm$ 1.4* |
| 1.6                              | 113.4 $\pm$ 0.5                        | 90.1 $\pm$ 1.3  | 26.8 $\pm$ 0.2* |
| 3.2                              | 98.3 $\pm$ 1.7                         | 24.5 $\pm$ 0.5* | 10.9 $\pm$ 0.8* |
| 6.4                              | 43.9 $\pm$ 0.8*                        | 11.3 $\pm$ 0.1* | 7.6 $\pm$ 0.3*  |
| 12.5                             | 12.4 $\pm$ 0.2*                        | 14.2 $\pm$ 0.3* | 5.4 $\pm$ 0.3*  |
| 25                               | 16.0 $\pm$ 0.1*                        | 18.9 $\pm$ 0.2* | 8.2 $\pm$ 0.2*  |
| 50                               | 14.2 $\pm$ 0.1*                        | 16.0 $\pm$ 0.1* | 5.6 $\pm$ 0.1*  |

**Table S2.** Viability of Caco-2 cells in the presence of acrylamide determined by the PrestoBlue assay. Each value represents the mean of eight repeats. Results are presented as mean  $\pm$  standard error of the mean (S.E.M.).

\* Results significantly different from unexposed control, ANOVA ( $p < 0.05$ ).

| Acrylamide<br>concentration [mM] | Viability of Caco-2 cells [%] $\pm$ SD |                  |                  |
|----------------------------------|----------------------------------------|------------------|------------------|
|                                  | 24 h                                   | 48 h             | 72 h             |
| 0.2                              | 101.9 $\pm$ 7.4                        | 106.1 $\pm$ 2.2  | 121.0 $\pm$ 2.5* |
| 0.4                              | 98.7 $\pm$ 9.7                         | 97.7 $\pm$ 16.2  | 107.7 $\pm$ 5.9  |
| 0.8                              | 99.6 $\pm$ 4.8                         | 96.6 $\pm$ 3.3   | 98.3 $\pm$ 14.9  |
| 1.6                              | 88.4 $\pm$ 11.6                        | 77.0 $\pm$ 16.9* | 81.9 $\pm$ 13.6* |
| 3.2                              | 85.9 $\pm$ 9.8                         | 57.2 $\pm$ 21.5* | 32.7 $\pm$ 3.3*  |
| 6.4                              | 62.1 $\pm$ 8.9*                        | 27.8 $\pm$ 1.5*  | 26.3 $\pm$ 1.0*  |
| 12.5                             | 33.4 $\pm$ 16.3*                       | 23.7 $\pm$ 0.8*  | 22.9 $\pm$ 0.8*  |
| 25                               | 25.1 $\pm$ 1.7*                        | 20.6 $\pm$ 0.6*  | 20.0 $\pm$ 0.6*  |
| 50                               | 21.6 $\pm$ 0.9*                        | 17.8 $\pm$ 0.5*  | 17.8 $\pm$ 0.6*  |
